# Supplementary material for: A resource for the Drosophila antennal lobe provided by the connectome of glomerulus VA1v
Source: eLife. 2018 Nov 1;7:e37550. doi: 10.7554/eLife.37550 (PMC6234030; doi:10.7554/eLife.37550)
Supplement: Figure 2—source data 1. — Name - putative name based on Tanaka et al., 2012; Cell_ID - unique id given by NeuTu program; soma - location of soma, or soma tract (t); vol – volume of neurite in glomerulus; T-bars - number of presynaptic ribbons; Pre - targets of pre-synapse; Post – postsynaptic site; PSDs per T-bar – Average number of targets of pre-synapse; pre/post – ratio of targets of pre-synapses to postsynaptic site; T-bar/vol – number of T-bars per neurite vol (µm−3). Figure illustrates designation of pre- and postsynaptic sites. [file elife-37550-fig2-data1.xlsx]

## Sheet: Table 2
						Table 2
						Inventory of cells in VA1v
	name - putative name based on Tanaka 2012
	Cell_ID - unique id given by NeuTu program
	soma - location of soma, or soma tract (t)
	vol – volume of neurite in glomerulus
	T-bars - number of presynaptic ribbons
	Pre - targets of pre-synapse
	Post – postsynaptic site
	PSDs per T-bar – Average number of targets of pre-synapse
	pre/post – ratio of targets of pre-synapses to postsynaptic site
	T-bar/vol - # of T-bars per neurite vol (µm-3)
											average per class
	name	Cell_ID	soma	vol (µm3)	T-bars	pre	post	PSDs per T-bar	pre/post	T-bar/vol	PSDs per T-bar	pre/post	T-bar/vol
	AL-AST3?	753633		9.04278	9	34	71	3.77778	0.478873	0.995269
	AL-lPN2	932210		39.081	168	604	31	3.59524	19.4839	4.29876	3.85157	6.74923	2.24215
	AL-lPN2	136973		32.5035	74	293	393	3.95946	0.745547	2.27668	0.22291	11.0345	2.07409
	AL-lPN2	161395		6.62199	1	4	219	4	0.0182648	0.151012
	AL-lPN2_Comm	208062		21.7025	21	69	446	3.28571	0.154709	0.967632
	AL-lPN4	965256		99.4638	100	387	1311	3.87	0.295195	1.00539	3.23697	0.113217	0.443957
	AL-lPN4	703	L	47.2779	11	34	934	3.09091	0.0364026	0.232667	0.574108	0.158234	0.491147
	AL-lPN4	933007		42.6372	4	11	1366	2.75	0.00805271	0.0938148
	AL-mlPN1	500319	VLt	126.616	63	199	2034	3.15873	0.0978368	0.497566	3.15873	0.0489184	0.248783
	AL-mlPN1	302	VLt	105.015	0	0	1854		0	0
	AL-mlPN2	521152	V	39.5521	0	0	1044		0	0	2.5942	0.0648324	0.522872
	AL-mlPN2	414	Vt	37.4812	3	8	1081	2.66667	0.00740056	0.0800401	0.102479	0.105949	0.837281
	AL-mlPN2	968577	Vt	15.451	23	58	310	2.52174	0.187097	1.48858
	AL-mlPN2 external	47835122	V	24.5639	79	245	216	3.10127	1.13426	3.2161
	AL-mlPN3	1129076	Vt	3.07174	0	0	66		0	0			0
	AL-mlPN3	9645816	Vt	2.95457	0	0	58		0	0
	AL-mPN1	622	A	178.783	242	861	2224	3.55785	0.38714	1.35359	3.53988	0.398922	1.44927
	AL-mPN1	205788	At	162.777	239	865	2286	3.61925	0.37839	1.46827	0.0897067	0.0283249	0.0877307
	AL-mPN1	230	A	154.003	235	809	1876	3.44255	0.431237	1.52594
	AL-mPN1 external	7346262	L	24.4903	38	105	126	2.76316	0.833333	1.55164	3.23302	1.42778	2.01626
	AL-mPN1 external	178405	AD	19.1756	39	134	120	3.4359	1.11667	2.03383	0.408172	0.796927	0.45609
	AL-mPN1 external	252139	AD	8.11917	20	70	30	3.5	2.33333	2.46331
	LN_commissure	387234		29.5731	61	197	190	3.22951	1.03684	2.06268	3.45725	2.65311	2.56777
	LN_commissure	3710676		17.2101	51	173	24	3.39216	7.20833	2.96338	0.754062	3.07773	1.26147
	LN_commissure	679856		10.004	41	111	62	2.70732	1.79032	4.09836
	LN_commissure	1177228		8.721	10	45	78	4.5	0.576923	1.14666
	LN_LV Exit	780		47.3003	98	310	316	3.16327	0.981013	2.07187	3.17577	0.967881	2.06904
	LN_LV Exit	842991		12.0819	31	91	73	2.93548	1.24658	2.56583	0.246782	0.285486	0.498218
	LN_LV Exit	1010		8.92057	14	48	71	3.42857	0.676056	1.56941
	LN1	2774127	DL	25.2062	44	135	184	3.06818	0.733696	1.7456	3.17678	1.09687	2.63464
	LN1	8229638	L	23.1491	43	143	187	3.32558	0.764706	1.85752	0.279433	0.295292	0.801912
	LN1	4123309	DL	20.2339	42	143	129	3.40476	1.10853	2.07572
	LN1	215363	Lt	18.7641	16	51	73	3.1875	0.69863	0.852691
	LN1	29271903	D	17.5344	42	124	113	2.95238	1.09735	2.39529
	LN1	15875406	D	15.4826	35	106	95	3.02857	1.11579	2.2606
	LN1	2873216	D	13.6447	45	153	98	3.4	1.56122	3.29798
	LN1	4914320	Dt	13.3271	33	102	81	3.09091	1.25926	2.47616
	LN1	8661823	Dt	12.6849	45	137	115	3.04444	1.1913	3.54752
	LN1	824206	DL	12.4232	38	121	128	3.18421	0.945312	3.0588
	LN1	4774084	D	12.0904	36	110	125	3.05556	0.88	2.97757
	LN1	2881422	L	10.7499	36	120	100	3.33333	1.2	3.34888
	LN1	2790470	DLt	10.1121	39	117	110	3	1.06364	3.85675
	LN1	170781	D	6.33944	18	53	42	2.94444	1.2619	2.83937
	LN1	293935032	D	5.7121	19	62	44	3.26316	1.40909	3.32627
	LN1	970337	DL	5.71958	18	49	29	2.72222	1.68966	3.14708
	LN1	745622	L	3.47802	6	24	36	4	0.666667	1.72512
	LN2L	2892	D	55.6099	98	304	855	3.10204	0.355556	1.76228	3.06186	1.0875	2.55437
	LN2L	729439	L	51.0974	156	439	541	2.8141	0.81146	3.05299	0.229075	0.374187	0.61226
	LN2L	1111680	L	47.058	96	316	452	3.29167	0.699115	2.04003
	LN2L	1194986	L	45.6579	145	439	364	3.02759	1.20604	3.17579
	LN2L	163341232	L	43.9922	145	401	404	2.76552	0.992574	3.29604
	LN2L	958321	L	30.9808	71	210	360	2.95775	0.583333	2.29174
	LN2L	151630	DL	30.4135	44	129	132	2.93182	0.977273	1.44673
	LN2L	95	L	28.8808	75	232	215	3.09333	1.07907	2.59688
	LN2L	162383	D	28.5037	89	254	228	2.85393	1.11404	3.1224
	LN2L	26077508	L	27.664	59	195	99	3.30508	1.9697	2.13274
	LN2L	455157	D	27.0844	71	207	167	2.91549	1.23952	2.62143
	LN2L	2984386	D	25.4248	55	201	116	3.65455	1.73276	2.16324
	LN2L	3894930	L	23.105	58	176	169	3.03448	1.04142	2.51028
	LN2L	207295731	DL	18.8137	42	127	83	3.02381	1.53012	2.23242
	LN2L	1933091	L	17.3272	37	116	129	3.13514	0.899225	2.13537
	LN2L	5556167		17.0915	30	109	160	3.63333	0.68125	1.75526
	LN2L	5354268	D	15.4255	41	120	109	2.92683	1.10092	2.65794
	LN2L	293934876	D	21.774	44	134	138	3.04545	0.971014	2.02076
	LN2L	9382928	D	14.1307	50	143	109	2.86	1.31193	3.53839
	LN2L	29221443	D	12.3563	35	109	111	3.11429	0.981982	2.83255
	LN2L	1198933	L	11.7538	35	98	69	2.8	1.42029	2.97776
	LN2L	11587708	L	10.7879	21	66	81	3.14286	0.814815	1.94662
	LN2L	12885603	D	10.3393	36	113	70	3.13889	1.61429	3.48185
	LN2L	12660980	Lt	3.4155	12	35	36	2.91667	0.972222	3.5134
	LN2V	933047	Vt	130.393	398	1317	1223	3.30905	1.07686	3.0523
	LN3	4163095		49.6002	125	371	404	2.968	0.918317	2.52015
	LN4	942946		24.9715	45	130	128	2.88889	1.01562	1.80205
	LN6	1155621		8.35718	28	118	7	4.21429	16.8571	3.35041	4.1941	20.4286	3.69485
	LN6	23291867		5.69406	23	96	4	4.17391	24	4.03929	0.0285478	5.05076	0.487113
	LNV	140765	V	76.6897	164	586	609	3.57317	0.962233	2.13849	3.477	0.893974	2.14212
	LNV	1993350	V	21.4677	51	184	142	3.60784	1.29577	2.37567	0.197355	0.439921	0.231756
	LNV	45091	V	6.27551	12	39	92	3.25	0.423913	1.9122
	ORN IPSI	21783864		27.4888	105	380	86	3.61905	4.4186	3.81974	3.63359	3.94256	3.9195
	ORN IPSI	3737475		27.4605	104	376	106	3.61538	3.54717	3.78726	0.129598	0.579568	0.418433
	ORN IPSI	988883		26.4612	98	369	109	3.76531	3.38532	3.70353
	ORN IPSI	115820		25.8788	80	294	79	3.675	3.72152	3.09134
	ORN IPSI	4245110		25.7888	92	334	96	3.63043	3.47917	3.56743
	ORN IPSI	54364		25.6477	88	324	86	3.68182	3.76744	3.4311
	ORN IPSI	1352065		25.5571	82	287	95	3.5	3.02105	3.2085
	ORN IPSI	45703556		25.4749	99	356	105	3.59596	3.39048	3.88619
	ORN IPSI	12122910		25.3603	101	379	93	3.75248	4.07527	3.9826
	ORN IPSI	4351587		25.315	95	330	86	3.47368	3.83721	3.75271
	ORN IPSI	8140263		25.024	93	351	69	3.77419	5.08696	3.71644
	ORN IPSI	3746929		24.7654	86	333	77	3.87209	4.32468	3.47259
	ORN IPSI	16063668		24.5137	90	329	81	3.65556	4.06173	3.67142
	ORN IPSI	57015		24.3231	102	380	97	3.72549	3.91753	4.19354
	ORN IPSI	66836		23.8606	94	351	79	3.73404	4.44304	3.93955
	ORN IPSI	2313125		23.8023	81	287	84	3.54321	3.41667	3.40303
	ORN IPSI	5912470		23.3028	79	274	76	3.46835	3.60526	3.39015
	ORN IPSI	23249389		23.0261	106	371	84	3.5	4.41667	4.60348
	ORN IPSI	1452417		22.84	83	304	80	3.66265	3.8	3.63397
	ORN IPSI	136730		22.6392	86	320	75	3.72093	4.26667	3.79873
	ORN IPSI	3		22.6321	100	376	95	3.76	3.95789	4.41851
	ORN IPSI	1772983		22.0529	89	293	86	3.29213	3.40698	4.03575
	ORN IPSI	1731911		22.0468	76	287	66	3.77632	4.34848	3.44721
	ORN IPSI	2312796		21.8152	81	313	75	3.8642	4.17333	3.713
	ORN IPSI	265878		21.6281	83	305	90	3.6747	3.38889	3.8376
	ORN IPSI	4809552		21.5273	91	325	93	3.57143	3.49462	4.2272
	ORN IPSI	3524827		21.2946	88	328	101	3.72727	3.24752	4.13251
	ORN IPSI	1739805		21.0856	77	275	65	3.57143	4.23077	3.65179
	ORN IPSI	1381108		20.9046	95	320	87	3.36842	3.67816	4.54445
	ORN IPSI	948450		20.7462	85	314	62	3.69412	5.06452	4.09714
	ORN IPSI	707650		20.6426	82	308	86	3.7561	3.5814	3.97236
	ORN IPSI	6081320		20.3203	69	248	79	3.5942	3.13924	3.39563
	ORN IPSI	1433950		20.1434	78	282	76	3.61538	3.71053	3.87224
	ORN IPSI	6782105		20.1018	76	272	83	3.57895	3.27711	3.78076
	ORN IPSI	740473		19.8122	89	317	67	3.5618	4.73134	4.49218
	ORN IPSI	473703		19.7667	84	290	68	3.45238	4.26471	4.24957
	ORN IPSI	6815707		19.4381	72	274	48	3.80556	5.70833	3.70406
	ORN IPSI	5443912		18.9674	75	286	67	3.81333	4.26866	3.95416
	ORN IPSI	136779		18.9451	79	283	71	3.58228	3.98592	4.16994
	ORN IPSI	2968278		18.6575	74	266	67	3.59459	3.97015	3.96623
	ORN IPSI	475992		17.8085	70	264	66	3.77143	4	3.9307
	ORN IPSI	871589		17.4835	63	236	61	3.74603	3.86885	3.60341
	ORN IPSI	1314176		16.3629	54	183	57	3.38889	3.21053	3.30014
	ORN IPSI	2315549		15.9768	80	293	78	3.6625	3.75641	5.00725
	ORN IPSI	66245		15.8102	73	253	50	3.46575	5.06	4.61727
	ORN IPSI	288994		15.6472	75	269	64	3.58667	4.20312	4.79319
	ORN IPSI	1087533		15.2557	58	205	50	3.53448	4.1	3.80186
	ORN IPSI	24604910		14.8943	61	213	53	3.4918	4.01887	4.09554
	ORN IPSI	155133		14.2768	64	236	67	3.6875	3.52239	4.48279
	ORN IPSI	41564188		12.1858	50	179	37	3.58	4.83784	4.10315
	ORN IPSI	979108		10.1268	45	170	59	3.77778	2.88136	4.44364
	ORN CONTRA	4400670		16.4572	49	160	34	3.26531	4.70588	2.97743	3.35569	5.29495	3.19446
	ORN CONTRA	17158343		14.966	44	146	32	3.31818	4.5625	2.93999	0.219879	1.44982	0.427144
	ORN CONTRA	1251132		14.7516	44	149	26	3.38636	5.73077	2.98273
	ORN CONTRA	108635056		14.714	52	174	22	3.34615	7.90909	3.53404
	ORN CONTRA	4973726		14.557	45	166	32	3.68889	5.1875	3.0913
	ORN CONTRA	9961874		13.6362	47	175	32	3.7234	5.46875	3.4467
	ORN CONTRA	27587193		13.315	41	151	31	3.68293	4.87097	3.07924
	ORN CONTRA	265286		13.2782	40	136	22	3.4	6.18182	3.01245
	ORN CONTRA	4502681		13.1837	42	141	30	3.35714	4.7	3.18575
	ORN CONTRA	176547		13.0499	42	127	26	3.02381	4.88462	3.21842
	ORN CONTRA	3758728		12.9904	38	112	21	2.94737	5.33333	2.92523
	ORN CONTRA	166957		12.9446	44	153	33	3.47727	4.63636	3.39911
	ORN CONTRA	26944289		12.71	42	132	31	3.14286	4.25806	3.3045
	ORN CONTRA	6761427		12.6593	30	100	24	3.33333	4.16667	2.3698
	ORN CONTRA	10553378		12.6504	44	147	44	3.34091	3.34091	3.47816
	ORN CONTRA	794204		12.3278	46	146	34	3.17391	4.29412	3.73141
	ORN CONTRA	6929056		12.3029	41	134	28	3.26829	4.78571	3.33255
	ORN CONTRA	29598135		12.2835	36	123	26	3.41667	4.73077	2.93077
	ORN CONTRA	3657410		11.8773	38	118	19	3.10526	6.21053	3.19939
	ORN CONTRA	574767		11.7483	29	102	23	3.51724	4.43478	2.46844
	ORN CONTRA	41890238		11.6384	31	105	27	3.3871	3.88889	2.66359
	ORN CONTRA	3890568		11.6244	43	153	26	3.55814	5.88462	3.69913
	ORN CONTRA	4196806		11.418	36	119	23	3.30556	5.17391	3.15292
	ORN CONTRA	3769295		11.3841	35	125	27	3.57143	4.62963	3.07446
	ORN CONTRA	27234223		11.3016	36	122	23	3.38889	5.30435	3.1854
	ORN CONTRA	26960808		11.071	42	120	25	2.85714	4.8	3.79369
	ORN CONTRA	14276708		10.9903	35	124	27	3.54286	4.59259	3.18463
	ORN CONTRA	474259		10.8899	38	125	31	3.28947	4.03226	3.48948
	ORN CONTRA	6196258		10.8669	38	133	27	3.5	4.92593	3.49686
	ORN CONTRA	473138		10.7787	36	126	22	3.5	5.72727	3.33993
	ORN CONTRA	3893613		10.6	37	127	28	3.43243	4.53571	3.49057
	ORN CONTRA	50002169		10.598	32	105	13	3.28125	8.07692	3.01944
	ORN CONTRA	46720845		10.5633	27	92	17	3.40741	5.41176	2.55602
	ORN CONTRA	501593		10.4436	33	121	20	3.66667	6.05	3.15983
	ORN CONTRA	8890		10.3674	34	107	27	3.14706	3.96296	3.2795
	ORN CONTRA	30371795		9.96891	33	111	20	3.36364	5.55	3.31029
	ORN CONTRA	17986129		9.8193	30	99	19	3.3	5.21053	3.05521
	ORN CONTRA	334938		9.72702	31	99	10	3.19355	9.9	3.187
	ORN CONTRA	16786441		9.65238	29	103	16	3.55172	6.4375	3.00444
	ORN CONTRA	1986834		9.45924	30	111	21	3.7	5.28571	3.1715
	ORN CONTRA	3779768		8.82191	34	119	22	3.5	5.40909	3.85404
	ORN CONTRA	21691874		8.774	21	71	9	3.38095	7.88889	2.39344
	ORN CONTRA	34310811		8.70311	26	79	27	3.03846	2.92593	2.98744
	ORN CONTRA	17316692		8.54538	20	70	7	3.5	10	2.34045
	ORN CONTRA	34170033		8.51798	21	73	10	3.47619	7.3	2.46537
	ORN CONTRA	3974		8.28238	26	85	21	3.26923	4.04762	3.13919
	ORN CONTRA	482257		8.20724	30	91	25	3.03333	3.64	3.65531
	ORN CONTRA	36		7.90762	27	94	14	3.48148	6.71429	3.41443
	ORN CONTRA	11215588		7.49815	21	66	13	3.14286	5.07692	2.80069
	ORN CONTRA	2312027		7.4498	27	92	15	3.40741	6.13333	3.62426
	ORN CONTRA	473589		7.10842	25	90	18	3.6	5	3.51696
	ORN CONTRA	16687076		6.93319	26	98	21	3.76923	4.66667	3.75008
	ORN CONTRA	13211176		6.68558	20	57	11	2.85	5.18182	2.99151
	ORN CONTRA	4005938		6.06047	26	92	14	3.53846	6.57143	4.2901
	ORN CONTRA	2190730		5.54232	14	42	12	3	3.5	2.52602
	ORN CONTRA	4532910		3.31825	14	43	16	3.07143	2.6875	4.21909
	Orphan	607253		21.4769	34	101	135	2.97059	0.748148	1.5831	3.31459	1.1335	2.68955
	Orphan	218396		19.5861	50	191	151	3.82	1.2649	2.55283	0.341407	0.398732	1.17096
	Orphan	293933750		8.96061	20	58	80	2.9	0.725	2.23199
	Orphan	293931142		5.12133	9	30	31	3.33333	0.967742	1.75736
	Orphan	293930118		4.88536	16	56	42	3.5	1.33333	3.27509
	Orphan	293933009		2.32219	11	37	21	3.36364	1.7619	4.7369
	Unknown	5161627		8.10832	22	67	60	3.04545	1.11667	2.71326
