# Supplementary material for: A resource for the Drosophila antennal lobe provided by the connectome of glomerulus VA1v
Source: eLife. 2018 Nov 1;7:e37550. doi: 10.7554/eLife.37550 (PMC6234030; doi:10.7554/eLife.37550)
Supplement: Figure 5—source data 1. — Data are the same as contribute to the matrix in Figure 5, but presented cell by cell. Register of cells with presynaptic sites (x axis, ordinate) plotted against the same cells having postsynaptic sites and colour-coded intercepts denoting the number of synaptic contacts between each pair (key), and thus the anatomical strength of their connection. Cells are arranged from the top left origin as, first, outputs (PNs), then interneurons (INs), and finally inputs (ORNs), and further organized within those groups by the particular cell. Among the total of 192 cells, dense pathways occupy few intercepts, mostly concentrated in ORN to PN, and PN to LN intercepts. Only cells with more than 50 pre- or postsynaptic contacts are included. [file elife-37550-fig5-data1.xlsx]

## Sheet: Figure 5
							252139
						POST
						Projection Neurons																						Local Interneurons
						mlPN3		AL-AST3?	mPN1 outside			AL-mlPN2 external	lPN2			AL-lPN2_Comm	mlPN2			lPN4			mlPN1		mPN1			LN from commissure				LN LV exit			LN1
						1129076	9645816	753633	178405	7346262	252139	47835122	136973	932210	161395	208062	414	521152	968577	965256	933007	703	500319	302	205788	622	230	387234	3710676	679856	1177228	780	842991	1010	8229638	2774127	4123309	824206	8661823	2873216	4774084	29271903	2790470	2881422	15875406	4914320	215363	293935032	170781
	PRE	Projection Neurons	mlPN3		1129076	0	0	0	0	0	0	0	0	0	0	0	0	0	0	0	0	0	0	0	0	0	0	0	0	0	0	0	0	0	0	0	0	0	0	0	0	0	0	0	0	0	0	0	0
					9645816	0	0	0	0	0	0	0	0	0	0	0	0	0	0	0	0	0	0	0	0	0	0	0	0	0	0	0	0	0	0	0	0	0	0	0	0	0	0	0	0	0	0	0	0
			AL-AST3?		753633	0	0	0	0	0	0	0	0	0	0	0	0	0	0	0	4	2	0	0	0	0	0	0	0	1	0	0	0	0	0	0	0	0	0	0	0	0	0	1	0	0	0	0	0
			mPN1 outside		178405	0	0	1	1	0	0	0	1	0	0	1	0	0	0	11	7	9	17	5	2	0	0	0	0	0	0	0	0	0	1	0	0	2	1	0	0	0	0	0	0	0	4	0	0
					7346262	3	3	0	0	2	0	0	0	0	0	1	0	1	0	5	2	2	0	0	5	6	0	0	0	0	0	0	0	0	1	1	0	0	1	0	0	0	0	0	0	0	0	0	0
					252139	0	0	3	1	0	0	0	1	0	0	0	0	0	1	8	2	4	0	0	0	0	0	0	0	0	0	0	0	0	1	0	0	3	1	0	0	0	0	0	1	0	2	0	0
			AL-mlPN2 external		47835122	0	0	0	0	1	1	0	4	0	0	2	1	0	0	1	1	0	0	1	1	0	1	0	0	0	1	0	0	0	0	3	0	0	0	0	0	0	0	0	0	0	0	0	1
			lPN2		136973	0	0	0	9	0	1	18	2	0	0	7	15	9	4	9	1	19	7	3	12	12	17	3	0	0	0	17	6	0	0	0	0	0	0	0	0	0	0	0	0	0	0	0	0
					932210	0	0	0	1	0	0	4	0	0	18	10	11	14	7	37	24	54	30	38	7	7	7	4	0	0	0	6	4	0	0	0	1	3	0	0	3	0	0	2	0	0	0	0	0
					161395	0	0	0	0	0	0	0	0	0	0	0	0	0	0	0	0	1	0	0	0	0	0	0	0	0	0	0	0	0	0	0	0	0	0	0	0	0	0	0	0	0	1	0	0
			AL-lPN2_Comm		208062	0	0	0	0	0	0	0	0	0	0	1	0	1	0	3	6	5	7	9	2	1	0	0	0	0	1	0	0	0	0	0	0	0	0	0	0	0	0	0	0	0	0	0	0
			mlPN2		414	0	0	0	0	0	0	0	0	0	0	0	0	0	0	1	0	0	3	0	0	0	0	0	0	0	0	0	0	0	0	0	0	0	0	0	0	0	0	0	0	0	0	0	0
					521152	0	0	0	0	0	0	0	0	0	0	0	0	0	0	0	0	0	0	0	0	0	0	0	0	0	0	0	0	0	0	0	0	0	0	0	0	0	0	0	0	0	0	0	0
					968577	0	0	0	0	0	0	0	0	0	0	0	0	0	0	0	0	0	0	0	0	0	1	0	0	0	0	0	0	0	0	0	0	0	0	0	0	0	0	0	0	0	0	0	0
			lPN4		965256	4	0	0	4	3	2	1	0	1	0	0	0	7	0	16	6	11	20	19	6	7	0	0	0	1	1	0	0	0	8	10	9	3	7	4	1	2	2	1	3	6	1	1	4
					933007	0	0	0	0	0	0	0	0	0	1	0	0	0	0	3	0	1	3	2	0	1	0	0	0	0	0	0	0	0	0	0	0	0	0	0	0	0	0	0	0	0	0	0	0
					703	0	0	1	0	0	0	1	0	0	0	0	0	0	0	0	1	0	4	1	3	0	1	0	0	0	0	0	0	0	0	0	0	0	0	0	0	0	0	0	0	0	1	0	0
			mlPN1		500319	0	9	0	0	0	0	0	1	0	4	0	7	4	0	3	16	5	4	3	2	12	4	0	0	0	0	0	0	0	2	0	1	2	1	0	1	0	1	0	2	0	0	0	0
					302	0	0	0	0	0	0	0	0	0	0	0	0	0	0	0	0	0	0	0	0	0	0	0	0	0	0	0	0	0	0	0	0	0	0	0	0	0	0	0	0	0	0	0	0
			mPN1		205788	2	4	11	1	15	0	0	1	0	2	2	6	5	0	16	6	30	40	19	16	8	6	5	0	6	0	0	0	3	16	23	9	13	11	14	13	12	14	9	21	7	9	2	4
					622	2	1	17	0	16	0	1	4	0	1	0	2	2	4	8	3	27	26	16	3	6	15	3	0	4	0	0	0	1	15	25	15	9	10	7	7	12	8	13	9	8	12	7	2
					230	3	2	3	0	6	0	0	4	0	3	2	2	3	4	5	8	31	46	39	4	16	15	2	0	4	0	2	0	1	18	9	13	10	9	9	7	7	5	7	8	3	10	4	3
		Local Interneurons	LN from commissure		387234	0	0	2	0	2	0	0	0	0	1	1	0	1	0	12	1	0	10	15	21	17	17	0	0	0	0	0	0	0	0	0	1	0	0	0	0	0	0	0	0	0	0	0	0
					3710676	0	0	0	0	0	0	0	0	0	0	0	1	3	1	5	0	2	9	12	22	15	10	1	0	0	0	1	0	0	0	0	0	0	0	0	0	2	0	0	0	0	0	0	0
					679856	0	0	0	0	0	0	0	1	0	0	0	0	0	0	2	0	0	1	1	5	0	3	0	0	0	0	0	0	0	0	1	0	0	0	0	0	0	0	0	0	0	0	0	0
					1177228	0	0	0	0	0	0	0	0	0	0	0	0	0	0	8	0	0	0	0	1	0	2	0	0	0	0	0	0	0	0	0	0	0	0	0	0	0	0	0	0	0	0	0	0
			LN LV exit		780	0	0	0	0	0	0	0	2	0	8	5	0	0	0	6	20	21	27	48	5	5	3	2	0	0	0	0	0	1	0	0	0	0	0	0	0	0	0	0	0	0	1	0	0
					842991	0	0	0	0	0	0	0	1	0	2	3	0	2	1	2	4	4	8	10	1	0	0	0	0	0	0	0	1	0	0	0	0	0	0	0	0	0	0	0	0	0	0	0	0
					1010	0	0	0	0	0	0	0	0	0	0	0	0	0	0	13	0	0	0	0	1	0	0	0	0	0	0	0	0	0	0	0	0	0	0	0	0	0	0	0	0	0	0	0	0
			LN1		8229638	0	0	0	1	3	0	0	0	0	0	1	0	0	2	2	0	0	8	4	7	6	5	0	0	1	0	3	0	0	0	2	0	0	0	0	0	0	0	0	0	1	0	1	0
					2774127	0	0	1	0	0	0	8	0	0	0	0	0	8	0	6	0	0	3	0	15	23	8	0	0	0	0	0	0	0	0	0	0	0	0	0	0	0	0	1	0	0	0	0	0
					4123309	0	0	0	1	0	0	0	0	0	0	0	0	1	0	4	1	0	11	13	1	3	6	0	0	0	0	1	0	0	2	2	0	10	6	2	9	3	5	1	2	0	2	0	0
					824206	0	0	0	0	0	0	0	0	0	1	0	1	0	0	4	0	2	8	12	2	3	4	0	1	0	0	0	0	0	2	1	7	0	0	4	4	4	10	2	3	1	0	1	1
					8661823	0	1	0	0	1	1	0	0	0	0	0	0	1	0	3	0	2	5	7	2	1	4	0	0	0	0	0	0	0	1	2	5	6	0	5	10	5	4	5	5	3	0	2	1
					2873216	0	0	1	1	1	0	0	0	0	0	0	1	1	0	2	0	1	8	11	3	4	6	0	0	0	0	0	0	0	4	3	4	7	3	1	4	2	4	7	2	4	0	3	1
					4774084	0	0	0	0	0	0	0	0	0	0	0	1	0	0	4	0	1	13	8	3	5	1	0	0	0	0	0	0	0	3	0	3	5	5	2	0	5	1	2	0	2	0	0	1
					29271903	0	0	0	2	0	0	0	0	0	0	0	0	0	0	3	0	1	6	6	4	2	3	1	0	0	0	0	0	0	3	0	5	2	3	4	7	0	9	1	4	2	0	1	0
					2790470	0	0	0	0	0	0	0	0	0	0	0	0	0	0	2	0	1	6	12	2	1	7	0	0	1	0	0	0	0	2	0	3	5	4	3	4	6	0	6	3	1	0	1	0
					2881422	0	0	0	0	1	0	0	0	0	1	0	0	0	0	3	1	1	7	10	2	3	2	0	0	1	0	0	0	0	1	4	8	2	6	1	5	6	2	0	0	2	2	1	0
					15875406	2	1	0	0	2	1	0	0	0	0	0	0	1	0	1	2	1	2	8	4	3	3	0	0	0	0	0	0	0	0	1	1	2	2	4	3	3	3	0	0	2	0	1	0
					4914320	0	0	0	0	0	0	0	0	0	2	1	0	0	0	1	0	2	5	9	4	1	4	0	0	0	0	0	0	0	1	0	3	3	7	1	3	5	4	4	2	0	0	0	1
					215363	0	0	0	0	0	0	0	0	0	0	0	0	1	0	0	2	4	0	1	0	0	1	0	0	0	0	0	0	0	0	0	0	0	0	0	0	0	0	0	0	0	0	0	0
					293935032	0	0	0	0	0	0	0	0	0	0	0	0	0	0	0	0	0	2	1	0	1	1	0	0	1	0	0	0	0	0	2	2	0	0	2	3	0	0	0	0	1	0	0	0
					170781	0	0	0	0	0	0	0	0	0	0	0	0	0	0	2	0	0	2	1	1	1	1	0	0	3	0	0	0	1	3	0	0	2	0	0	1	0	2	0	0	1	0	0	0
					970337	0	0	0	0	0	0	1	0	0	0	0	0	3	0	4	1	0	0	0	2	4	0	0	0	0	0	0	0	0	0	2	0	1	1	0	0	0	1	0	0	0	0	0	0
					745622	0	0	3	0	0	0	0	0	0	0	0	0	0	0	1	0	0	0	1	0	0	2	0	0	0	0	0	0	0	0	0	0	0	1	0	0	0	0	0	0	0	0	0	0
			LN2L		2892	0	0	1	0	1	0	0	6	0	0	0	0	0	0	4	2	5	6	5	5	9	13	0	0	0	0	0	1	0	1	10	1	0	0	0	0	0	0	0	0	0	0	0	0
					729439	0	0	1	0	1	0	0	11	0	1	0	0	0	1	3	2	2	15	1	5	5	8	0	0	2	0	0	0	0	3	9	1	0	0	0	0	0	2	0	2	0	0	1	0
					163341232	0	0	0	1	2	0	1	1	0	0	0	2	0	1	1	2	2	8	5	5	5	3	0	0	2	2	0	0	0	14	7	2	2	1	3	2	1	3	1	0	1	0	0	0
					1194986	0	0	1	0	0	0	0	11	0	0	0	0	1	1	1	1	0	1	0	3	2	4	0	0	4	0	2	0	0	5	9	0	1	0	0	0	2	0	0	0	1	0	0	0
					1111680	0	0	4	2	1	0	0	0	0	0	1	2	0	0	7	0	6	7	5	8	4	12	0	0	0	0	1	0	0	12	4	5	4	8	3	4	3	5	7	3	4	7	0	1
					958321	0	0	0	0	0	0	0	3	0	0	0	0	0	0	5	1	3	5	4	5	9	1	0	0	0	0	1	0	0	1	5	0	0	0	1	0	0	0	0	0	0	0	0	0
					162383	1	0	0	1	0	0	1	3	0	1	2	1	1	4	13	2	1	9	4	17	20	12	1	0	1	1	3	1	0	1	0	1	0	0	0	1	1	1	2	1	0	0	0	0
					95	0	0	0	1	1	1	3	1	0	0	1	2	1	7	4	0	0	23	16	8	7	6	0	0	0	0	0	0	0	3	1	0	0	0	0	1	0	0	2	0	2	0	1	0
					455157	0	0	1	0	1	0	0	2	0	0	0	0	1	1	4	0	0	6	3	9	6	10	1	0	0	0	5	1	0	0	0	0	0	0	1	0	0	1	0	0	0	0	1	1
					3894930	0	0	0	0	2	0	0	0	0	0	0	1	0	0	5	0	0	10	15	5	8	8	0	0	0	0	0	0	0	3	1	2	0	1	2	1	1	0	1	0	0	0	0	0
					2984386	0	0	0	0	0	0	0	0	0	1	0	0	0	0	9	0	2	23	15	9	16	8	0	0	0	0	1	0	0	0	0	1	0	0	0	0	0	0	0	0	2	0	0	0
					26077508	0	0	0	0	1	0	0	2	0	0	1	1	1	0	5	2	5	6	14	13	11	13	1	0	0	0	0	0	0	2	3	1	2	0	2	1	2	1	0	1	3	0	0	0
293935032					293934876	0	0	0	0	0	0	1	0	0	0	0	0	1	0	5	0	2	13	18	3	2	0	0	0	0	0	1	0	0	0	0	2	4	7	6	5	4	3	3	2	3	0	0	0
293935032					5556167	0	0	0	0	1	1	0	0	0	4	1	0	2	1	5	7	0	11	8	11	7	1	0	0	0	0	0	0	0	2	0	0	0	0	0	0	0	1	1	0	0	0	0	1
					9382928	0	0	0	0	1	1	0	0	1	3	0	0	0	0	1	1	1	10	17	3	5	3	0	0	0	0	1	0	0	0	1	6	2	4	3	2	8	5	6	3	2	0	0	1
					151630	3	2	0	0	0	0	0	0	0	0	0	1	1	0	0	2	2	1	1	10	10	8	0	0	0	0	0	0	0	3	0	0	1	0	0	0	0	0	0	0	0	1	0	0
					1933091	0	0	0	0	0	0	4	0	0	0	1	0	0	0	1	0	0	5	12	4	3	6	0	0	0	0	1	0	1	0	0	1	0	0	1	1	0	0	0	0	0	0	0	0
					5354268	0	0	1	0	0	0	1	0	0	0	1	1	0	0	2	0	0	7	3	6	6	3	0	0	1	0	0	0	0	2	0	1	0	1	1	1	1	2	0	0	2	0	1	1
					29221443	0	0	0	0	0	0	0	0	0	0	0	0	0	0	1	0	2	11	10	1	7	6	0	0	0	0	1	0	0	1	0	3	4	3	1	3	4	1	4	4	3	0	1	2
					207295731	0	0	0	0	0	0	0	4	0	0	0	1	1	0	5	0	1	9	2	8	6	6	1	0	0	0	0	0	0	0	0	1	0	0	1	1	0	1	0	2	2	0	0	1
					12885603	0	0	1	0	0	0	0	0	0	0	0	1	0	1	7	0	0	5	6	3	1	6	0	0	1	0	0	1	0	1	0	3	8	3	2	6	0	2	3	0	1	1	2	3
					1198933	0	0	0	0	1	0	0	0	0	0	1	1	0	0	4	0	0	2	3	4	3	1	0	0	1	0	0	0	0	1	2	1	0	1	0	0	0	0	0	0	0	0	0	0
					11587708	0	0	0	0	3	0	5	1	0	0	0	0	0	0	0	2	0	6	2	1	1	4	1	0	0	0	0	0	1	0	0	0	0	0	0	2	1	0	0	0	0	0	0	0
					12660980	0	0	0	0	0	0	1	0	0	0	0	0	0	0	2	0	0	0	0	1	0	0	1	0	0	0	0	0	0	1	0	0	0	0	0	0	0	0	0	0	1	0	0	0
			LN2V		933047	0	0	7	4	4	1	0	20	4	9	7	54	60	8	59	59	18	113	102	94	106	107	2	1	1	10	3	2	10	1	0	0	1	0	0	2	1	0	0	0	0	7	0	0
			LN3		4163095	0	0	1	0	2	0	0	1	0	6	4	1	5	0	7	17	6	36	27	5	8	4	5	0	2	0	0	0	0	3	7	2	4	1	3	3	3	4	4	1	3	0	3	0
			LN4		942946	10	2	0	0	0	1	0	2	0	0	0	0	2	0	3	5	1	0	1	5	9	4	0	0	0	0	0	0	0	0	0	0	0	0	0	0	0	0	0	0	0	0	0	0
			LN6		1155621	0	1	0	0	5	0	5	0	0	0	0	0	0	0	0	0	0	7	0	0	1	0	1	0	1	0	0	0	0	4	9	1	0	2	1	0	1	0	0	1	2	1	0	0
					23291867	0	0	0	0	3	0	1	0	0	0	0	0	0	0	1	0	0	3	0	0	0	1	0	0	0	0	0	0	0	2	11	0	0	2	0	1	1	3	2	0	0	0	0	0
			LNV		140765	35	23	0	0	2	0	1	3	0	7	4	17	11	5	25	28	19	5	5	2	7	7	3	1	2	0	5	0	0	3	2	0	1	0	0	0	1	0	0	3	2	0	1	0
					1993350	1	0	0	0	1	0	0	0	0	1	4	0	7	0	8	13	5	26	6	9	7	10	0	0	0	0	0	0	0	2	1	2	1	0	1	0	1	0	0	0	0	0	0	1
					45091	0	0	0	0	0	0	0	0	0	0	1	0	0	0	0	0	0	0	0	3	2	0	0	0	0	0	0	0	0	0	0	0	0	0	0	0	0	0	0	0	0	0	0	0
		Ipsilateral Olfactory Receptor Neurons			3737475	0	0	0	0	0	0	0	0	0	0	3	9	36	1	25	31	13	27	30	32	30	19	4	0	0	0	1	0	3	0	0	0	0	0	0	0	0	0	0	0	0	0	0	0
					57015	0	0	0	0	0	0	0	0	2	3	7	13	30	4	16	9	15	20	34	28	35	33	2	0	0	0	6	0	3	0	0	0	0	0	0	0	0	0	0	0	0	0	0	0
					21783864	0	0	0	0	0	0	0	0	0	2	3	19	29	5	10	46	13	21	28	34	18	25	3	0	0	2	2	0	1	0	0	0	0	0	0	0	0	0	0	0	0	0	0	0
					12122910	0	0	0	0	0	0	0	1	0	3	4	22	18	7	12	40	11	29	21	27	25	21	6	0	0	0	0	0	0	0	0	0	0	0	0	0	0	0	0	0	0	0	0	0
					23249389	0	0	0	0	0	0	0	0	0	3	4	17	29	5	23	32	18	30	18	19	44	20	4	0	0	0	1	0	0	0	0	0	0	0	0	0	0	0	0	0	0	0	0	0
					3	0	0	0	0	0	0	0	0	0	2	4	20	25	6	14	22	14	25	39	18	26	40	1	0	0	0	2	0	1	0	0	0	0	0	0	0	0	0	0	0	0	0	0	0
					988883	0	0	1	0	0	0	0	0	0	5	8	24	13	7	10	14	15	35	29	38	31	18	3	0	0	0	0	0	3	0	0	0	0	0	0	0	0	0	0	1	0	0	0	0
					45703556	0	0	1	0	0	0	0	1	0	1	2	21	16	5	7	12	7	25	38	41	31	28	8	0	0	3	1	0	0	0	0	0	0	0	0	0	0	0	0	0	0	0	0	0
					3524827	0	0	0	0	2	0	1	0	0	3	10	24	13	2	14	3	11	29	27	31	42	20	4	0	0	1	1	0	0	0	0	0	0	0	0	0	0	0	0	0	0	0	1	0
					4809552	0	0	0	0	2	0	0	0	2	0	6	35	18	6	11	20	11	17	24	35	30	15	2	0	0	1	2	0	0	0	0	0	0	0	0	0	0	0	0	0	0	0	0	0
					4245110	0	0	0	1	1	0	0	2	2	6	5	21	16	6	14	29	11	17	13	26	22	23	2	0	0	0	1	0	1	0	0	0	0	0	0	0	0	0	0	0	0	0	0	0
					4351587	0	0	0	0	0	0	0	0	0	0	7	19	27	2	10	34	9	13	24	18	26	20	1	0	0	0	0	0	1	0	0	0	0	0	0	0	0	0	0	0	0	0	0	0
					66836	0	0	0	0	0	0	0	1	0	3	5	18	20	9	16	30	14	16	25	21	27	18	1	0	0	1	0	0	2	0	1	0	0	0	0	0	0	0	0	0	0	0	0	0
					54364	0	0	0	0	0	0	0	0	1	2	8	27	15	6	7	23	17	22	23	26	38	23	3	0	0	0	3	0	1	0	1	0	0	0	0	0	0	0	0	0	0	1	0	0
					1381108	0	0	0	0	0	0	0	1	0	5	7	18	8	9	11	11	5	26	20	38	26	17	4	1	0	1	3	0	1	0	1	0	0	0	0	0	0	0	0	0	0	0	0	0
					707650	0	0	0	0	0	0	0	0	0	0	8	19	12	2	17	13	6	37	18	38	26	20	2	0	0	0	4	0	0	0	0	0	0	0	0	0	0	0	0	0	0	0	0	0
					16063668	0	0	0	0	0	0	0	0	0	4	14	19	17	8	18	28	19	27	17	12	22	21	0	0	1	1	0	0	1	0	0	0	0	0	0	0	0	0	0	0	0	0	0	0
					8140263	0	0	0	0	0	0	0	1	0	3	7	20	11	5	15	24	6	21	19	30	27	17	3	1	0	3	2	0	2	1	0	0	0	0	0	0	0	0	0	0	0	0	0	0
					3746929	0	0	0	0	2	0	0	0	0	2	10	16	20	1	19	43	13	31	14	18	12	11	0	1	0	1	1	0	0	0	0	0	0	0	0	0	0	0	0	0	0	0	0	0
					2312796	0	0	0	0	0	0	0	0	0	1	8	22	12	1	20	12	15	23	38	22	29	25	3	0	0	1	1	0	1	0	0	0	0	0	0	0	0	0	0	0	0	0	0	0
					136730	0	0	0	2	1	0	0	0	0	6	9	16	21	0	6	16	9	21	24	29	26	24	5	0	0	3	1	0	0	0	0	0	0	0	0	0	0	0	0	0	0	0	0	0
					740473	0	0	0	0	0	0	0	0	0	0	19	21	11	1	7	32	14	17	21	25	13	14	2	0	0	1	1	0	1	0	0	0	0	0	0	0	0	0	0	0	0	0	0	0
					948450	0	0	0	0	0	0	0	0	0	0	9	18	15	2	16	34	8	22	15	22	21	19	3	0	0	1	0	1	2	1	0	0	0	0	1	0	0	0	0	0	0	0	0	0
					265878	0	0	0	0	1	0	0	0	0	0	3	31	13	2	7	12	4	23	13	23	25	23	1	0	0	1	2	0	0	0	0	0	1	0	0	0	0	0	0	0	0	0	0	0
					115820	0	0	0	0	0	0	0	0	0	3	5	17	19	9	13	36	13	23	20	23	14	18	2	0	0	0	1	0	3	0	0	0	0	0	0	0	0	0	0	0	1	0	0	0
					1352065	0	0	0	0	0	0	0	1	0	3	3	12	15	3	11	3	9	28	22	34	31	25	1	0	0	0	2	0	1	0	1	0	0	0	0	0	1	0	0	0	0	1	0	0
					1452417	0	0	0	0	1	0	0	0	0	1	5	27	19	2	6	28	8	21	19	14	25	23	7	0	0	2	1	0	0	0	1	0	0	0	0	0	0	0	0	0	0	0	0	0
					1772983	0	0	0	0	1	0	1	1	0	1	4	16	12	2	15	10	10	23	27	28	26	16	4	0	0	0	1	0	1	0	0	0	0	0	0	0	1	0	0	0	0	0	0	0
					2315549	0	0	0	0	0	0	0	0	1	1	6	24	5	3	25	19	12	23	13	25	17	15	2	0	0	3	0	0	0	0	0	0	0	0	0	0	0	0	0	0	0	0	0	0
					2313125	0	0	0	0	0	0	0	1	0	5	7	12	24	2	9	19	13	27	14	14	13	14	4	0	0	1	1	0	0	0	0	0	0	0	0	0	0	0	0	0	0	0	0	0
					6782105	0	0	0	0	1	0	0	0	0	6	9	16	10	3	10	20	12	10	26	12	13	18	2	2	0	1	0	0	1	0	0	0	0	0	0	0	0	0	0	0	0	0	0	0
					136779	0	0	0	0	0	0	0	0	0	0	5	14	11	6	21	10	9	20	24	30	31	16	4	0	0	1	0	0	0	0	0	0	0	0	0	0	0	0	0	0	0	0	0	0
					5443912	0	0	0	1	0	0	1	0	2	3	5	12	18	7	15	18	5	20	25	28	21	22	1	0	0	1	0	0	0	1	0	0	0	0	0	0	0	0	0	0	0	0	0	1
					1433950	0	0	0	0	1	0	0	0	0	4	9	15	6	3	20	26	7	20	16	18	16	9	1	1	0	0	0	0	1	0	0	0	0	0	0	0	0	0	0	0	0	0	0	0
					5912470	0	0	0	0	0	0	0	0	2	0	3	16	11	8	11	18	6	21	16	26	27	13	0	0	0	1	1	0	0	0	0	0	0	0	0	0	0	0	0	2	0	0	0	0
					1739805	0	0	0	0	0	0	0	0	0	3	5	15	11	4	9	18	10	25	17	26	21	20	0	0	0	1	0	0	2	0	0	0	0	0	0	0	0	0	0	0	0	0	0	0
					288994	0	0	0	0	0	0	0	0	0	2	9	18	20	4	11	28	11	17	28	19	12	22	1	2	0	0	2	0	2	0	0	0	0	0	0	0	0	0	0	0	0	0	0	0
					473703	0	0	0	0	0	0	0	1	0	4	11	10	21	7	3	13	10	24	18	20	20	15	1	0	0	0	3	0	1	0	1	0	0	0	0	0	0	0	0	0	0	0	0	0
					1731911	0	0	0	0	0	0	0	0	1	0	6	18	11	5	21	31	10	17	23	14	15	6	3	1	0	2	2	0	1	0	0	0	0	0	0	0	0	0	0	0	0	0	0	0
					475992	0	0	0	0	0	0	0	1	0	2	6	8	16	2	5	5	13	28	22	24	31	22	2	0	0	1	1	0	1	1	0	0	0	0	0	0	0	0	0	0	0	0	0	0
					2968278	0	0	0	0	0	0	0	0	0	1	3	14	11	10	11	4	9	20	27	17	19	24	1	0	1	1	0	0	0	0	0	0	0	0	0	0	0	0	0	0	0	0	0	0
					6081320	0	0	0	0	0	0	0	0	0	3	4	17	11	2	8	6	14	23	21	16	20	16	6	0	0	1	0	0	0	0	0	0	0	0	0	0	0	0	0	0	0	0	0	0
					155133	0	0	0	0	0	0	0	1	0	1	5	7	22	1	7	20	12	28	12	15	15	20	3	0	0	0	0	0	1	0	0	0	0	0	0	0	0	0	0	0	0	0	0	0
					6815707	0	0	0	0	1	0	0	0	0	6	14	15	11	2	9	12	13	17	19	28	22	18	0	0	0	0	1	0	0	0	0	0	0	0	0	0	0	0	0	0	0	0	0	0
					66245	0	0	0	0	0	0	0	1	0	4	7	9	14	8	14	24	16	9	17	21	10	14	1	0	0	0	3	0	1	0	0	0	1	0	0	0	0	0	0	0	0	0	0	0
					871589	0	0	0	0	0	0	0	0	0	4	2	10	9	6	11	6	7	25	20	14	31	13	6	1	0	0	0	0	0	0	0	0	0	0	0	0	0	0	0	0	0	0	0	0
					24604910	0	0	0	0	0	0	0	0	0	5	6	5	12	4	11	12	4	10	23	16	15	14	1	0	0	0	1	0	0	0	1	0	0	0	0	0	0	0	1	0	0	0	0	0
					1087533	0	0	0	0	0	0	0	0	0	0	6	14	3	4	10	9	10	15	19	20	18	13	1	0	0	1	0	0	0	0	0	0	0	0	0	0	0	0	0	0	0	0	0	0
					979108	0	0	0	0	0	0	0	0	0	0	7	5	9	0	12	16	8	10	13	10	11	4	5	0	0	1	0	0	3	0	0	0	0	0	0	0	0	0	0	0	0	0	0	0
					1314176	0	0	1	0	0	0	0	0	0	0	3	8	11	4	4	0	2	21	17	14	14	14	0	0	0	2	0	0	1	0	0	0	0	0	0	0	0	0	0	0	0	0	0	0
					41564188	0	0	0	0	0	0	0	1	1	4	8	10	6	2	6	5	14	7	14	16	9	12	1	0	0	0	1	0	0	1	0	0	0	0	0	0	0	0	0	0	0	0	0	0
		Contralateral Olfactory Receptor Neurons			9961874	0	0	0	4	0	0	0	13	0	0	0	0	1	0	2	0	0	2	1	13	28	11	0	0	2	0	15	1	0	0	0	0	0	0	0	0	0	0	0	0	0	0	0	0
					10553378	0	0	0	0	0	0	7	6	1	0	2	5	0	0	3	4	1	1	1	15	13	14	1	0	0	1	3	0	0	0	0	0	0	0	0	0	0	0	0	0	0	0	0	0
					4973726	0	0	0	5	0	0	7	9	1	0	3	0	0	0	1	0	2	1	3	17	11	16	0	0	0	0	13	0	0	0	0	0	0	0	0	0	0	0	0	0	0	0	0	0
					4400670	0	0	0	4	0	0	0	4	0	0	0	1	0	5	5	0	0	2	0	13	24	12	0	0	0	0	13	2	0	0	0	0	0	0	0	0	0	0	0	0	0	0	0	0
					108635056	0	0	0	6	0	0	9	7	0	0	4	0	0	0	11	1	4	3	0	17	12	7	0	0	0	0	4	0	0	0	0	0	0	0	0	0	0	0	0	0	0	0	0	0
					166957	0	0	0	0	0	0	0	5	0	3	0	5	3	2	0	5	0	5	0	9	11	12	0	0	0	0	5	0	0	1	0	0	0	0	0	0	0	0	0	0	0	0	0	0
					3890568	0	0	0	3	0	0	8	8	0	0	0	1	0	0	5	1	0	0	0	12	13	11	0	0	0	0	0	5	0	0	0	0	0	0	0	0	0	0	0	0	0	0	0	0
					17158343	0	0	0	0	2	0	5	1	0	0	0	0	1	2	7	8	1	2	1	14	8	10	0	0	0	0	0	0	0	2	0	0	0	0	1	0	0	0	0	0	0	0	0	0
					794204	0	0	0	1	0	0	9	7	1	0	0	0	2	1	4	2	3	2	1	18	6	14	0	1	0	0	8	0	0	0	0	0	0	0	0	0	0	0	0	0	0	0	0	0
					1251132	0	0	0	0	0	0	2	10	0	0	1	1	0	0	5	0	0	3	0	13	19	14	0	0	0	0	21	2	0	0	0	0	0	0	0	0	0	0	0	0	0	0	0	1
					27587193	0	0	0	4	0	0	4	10	0	0	0	0	1	0	5	0	0	2	0	12	21	5	0	0	0	0	7	2	0	0	0	0	0	0	0	0	0	0	0	0	0	0	0	0
					4502681	0	0	0	3	0	0	2	7	0	0	0	0	0	0	10	0	1	4	0	19	6	4	0	0	1	1	0	3	0	1	0	0	0	0	0	0	0	0	0	1	0	0	0	1
					26944289	0	0	0	3	0	0	2	7	0	0	0	2	1	2	0	0	0	1	2	20	12	17	0	0	0	0	5	0	0	0	0	0	0	0	0	0	0	0	0	0	0	0	0	0
					6929056	0	0	0	0	2	0	7	4	1	0	3	1	1	0	6	1	0	2	1	11	12	5	1	0	1	1	0	1	1	1	0	0	0	0	0	0	0	0	0	0	0	0	0	0
					6196258	0	0	0	0	0	0	0	3	0	0	1	3	0	2	4	0	0	5	1	12	17	10	0	1	0	0	8	0	0	0	0	0	0	0	0	0	0	0	0	0	0	0	0	0
					474259	0	0	0	0	0	0	3	6	0	0	0	1	2	0	13	0	0	4	0	10	14	7	2	0	0	0	2	0	0	0	0	0	0	0	0	0	0	0	0	0	0	0	0	0
					176547	0	0	0	1	0	0	2	6	0	0	0	1	2	0	3	0	0	2	0	12	7	11	1	0	0	0	1	0	1	0	0	0	0	0	0	0	0	0	0	0	0	0	0	0
					265286	0	0	0	0	0	0	1	4	0	0	3	3	1	3	4	0	0	2	1	15	15	11	0	2	0	0	5	4	0	1	0	0	0	0	0	0	0	0	0	0	0	0	0	0
					3893613	0	0	0	1	1	0	2	7	0	0	1	0	0	0	1	0	0	4	0	19	4	10	0	0	2	0	0	0	0	0	0	0	0	0	0	0	0	0	0	0	0	0	0	0
					29598135	0	0	0	1	3	0	4	1	0	1	2	0	1	1	0	0	2	1	2	16	7	5	0	2	0	0	1	0	1	0	1	0	0	0	0	0	0	0	0	0	0	0	0	0
					473138	0	0	0	0	1	0	2	7	0	0	0	2	7	2	0	1	0	0	3	13	4	12	0	1	0	1	4	0	0	1	0	0	0	0	0	0	0	0	0	0	0	1	0	0
					14276708	0	1	0	4	0	0	1	7	0	0	0	0	1	0	2	0	0	1	0	8	8	12	0	0	0	0	3	0	1	1	0	0	0	0	0	0	0	0	0	0	0	0	0	0
					26960808	0	0	0	0	1	0	3	0	0	0	0	0	2	0	4	3	0	4	0	11	8	10	0	0	1	0	1	0	0	0	0	0	0	0	0	0	0	0	0	0	0	0	1	0
					27234223	0	0	0	0	0	0	2	7	0	0	0	1	1	0	7	1	0	1	0	13	6	12	0	0	0	0	6	5	0	0	0	0	0	0	0	0	0	0	0	0	0	0	0	0
					501593	0	0	0	2	0	0	1	9	0	0	0	2	1	0	3	1	1	2	0	7	10	11	0	0	0	1	3	3	0	0	0	0	0	0	0	0	0	0	0	0	0	0	0	2
					3769295	0	0	0	1	0	0	5	4	0	0	0	2	2	0	8	0	2	3	0	16	9	4	0	0	0	0	0	0	0	0	0	0	0	0	0	0	0	0	0	0	0	0	1	0
					4196806	0	0	0	0	0	0	0	2	0	0	0	3	1	1	4	1	0	2	2	14	11	6	0	0	0	0	2	1	0	0	0	0	0	0	0	0	0	0	0	1	0	0	0	0
					41890238	0	0	0	0	0	0	5	2	1	5	2	1	0	2	7	2	0	0	0	5	11	7	1	0	0	0	1	1	0	2	0	0	0	0	0	0	0	0	0	0	0	0	0	0
					8890	0	0	0	0	0	0	6	5	0	0	7	0	0	1	7	0	0	1	0	8	5	8	1	1	0	0	6	5	0	0	0	0	0	0	0	0	0	0	0	0	0	0	1	0
					3779768	0	0	0	1	1	0	0	9	0	0	0	2	1	0	6	0	0	6	2	14	11	7	2	0	0	0	2	1	0	1	0	0	0	0	0	0	0	0	0	0	0	0	0	0
					1986834	0	0	0	5	0	0	0	6	0	0	1	1	1	0	2	1	0	1	0	11	5	5	0	0	0	0	4	0	0	1	0	0	0	0	0	0	0	0	0	0	0	0	0	1
					30371795	0	0	0	0	0	0	0	2	0	0	0	2	3	0	2	3	0	1	0	7	7	8	0	0	0	2	0	0	0	1	1	0	0	0	0	0	0	0	0	0	0	0	0	0
					574767	0	0	0	0	0	0	3	4	0	0	2	2	3	2	3	0	1	1	3	11	13	6	1	1	0	0	4	0	0	0	0	0	0	0	0	0	0	0	0	0	0	0	0	0
					3657410	0	0	0	0	0	0	1	8	0	0	0	2	1	1	3	0	0	1	0	10	6	8	0	0	0	0	3	0	0	0	1	0	0	0	0	0	0	0	0	0	0	0	0	0
					3758728	0	0	1	0	0	0	1	2	1	0	0	2	1	3	3	0	0	4	0	10	9	6	2	0	0	0	1	0	0	1	0	0	0	0	0	0	0	0	0	0	0	0	0	0
					16687076	0	0	0	0	1	0	5	4	0	0	0	1	1	0	6	0	0	1	0	6	12	3	0	0	0	0	0	0	0	1	0	0	0	0	0	0	0	0	0	0	0	0	0	0
					17986129	0	0	0	0	1	0	1	7	0	0	0	1	1	0	2	0	0	2	2	18	5	3	0	0	0	0	0	0	0	0	0	0	0	0	0	0	0	0	0	0	0	0	0	0
					50002169	0	0	0	0	0	0	7	2	0	1	1	2	5	0	10	3	0	0	0	6	6	2	0	0	1	0	0	0	0	0	1	0	0	0	0	0	0	0	0	0	0	0	0	0
					6761427	0	0	0	0	0	0	1	3	0	0	3	1	0	0	5	5	0	4	0	7	5	5	0	0	0	0	1	0	0	0	0	0	0	1	0	0	0	0	0	0	0	0	1	0
					16786441	0	0	0	0	0	0	1	5	0	0	0	2	0	1	0	0	0	4	0	5	9	13	0	0	0	0	16	0	0	0	0	0	0	0	0	0	0	0	0	0	0	0	0	0
					482257	0	0	0	2	0	0	3	2	0	0	0	1	2	4	1	2	0	3	0	5	13	4	1	0	0	0	4	0	0	0	0	0	0	0	0	0	0	0	0	0	0	0	0	0
					473589	0	0	0	4	0	0	2	8	0	0	0	1	1	0	6	0	0	1	0	5	7	2	0	0	0	0	4	6	0	0	0	0	0	0	0	0	0	0	0	0	0	0	0	0
					46720845	0	0	0	0	2	0	1	1	0	0	1	5	0	0	7	2	0	1	1	7	7	1	4	0	1	1	0	0	1	0	0	0	0	0	0	0	0	0	0	0	0	0	0	0
					3974	0	0	0	2	0	0	0	4	0	0	1	0	1	0	2	0	0	0	1	5	6	8	0	0	0	1	7	0	3	0	0	0	0	0	0	0	0	0	0	0	0	0	0	0
					2312027	0	0	0	0	2	0	1	0	1	0	1	0	1	0	2	1	1	1	0	10	8	6	2	0	0	3	2	0	0	1	0	0	0	0	0	0	0	0	0	0	0	0	0	0
					4005938	0	0	0	4	0	0	0	3	0	3	0	1	0	0	2	0	1	2	0	7	8	4	1	0	0	0	0	5	0	1	0	0	0	0	0	0	0	0	0	0	0	0	1	1
					34310811	0	0	0	0	0	0	3	6	0	0	0	0	1	0	1	4	0	3	0	8	5	5	0	0	0	0	0	0	0	0	0	0	0	0	0	0	0	0	0	0	0	0	0	0
					334938	0	0	0	0	0	0	0	3	0	0	0	1	2	0	0	0	0	2	0	11	8	10	0	0	1	0	7	0	0	1	0	0	0	0	0	0	0	0	0	0	0	0	0	0
					36	0	0	0	0	1	0	2	7	0	1	2	4	0	0	4	1	1	2	0	7	7	5	1	0	0	1	1	0	0	1	0	0	0	0	0	0	0	0	0	0	0	0	0	1
					34170033	0	0	0	1	0	0	4	6	0	0	0	4	1	0	2	6	2	1	0	7	5	3	0	0	0	0	0	0	0	0	0	0	0	0	0	0	0	0	0	0	0	0	0	0
					21691874	0	0	0	0	0	0	0	8	0	0	0	0	0	0	2	1	0	2	0	13	5	6	0	0	0	1	2	4	0	0	0	0	0	0	0	0	0	0	0	0	0	0	0	0
					17316692	0	0	0	0	0	0	0	0	0	0	0	0	2	0	5	0	1	3	4	8	9	6	0	0	0	0	0	0	0	0	0	0	0	0	0	0	0	0	0	0	0	0	0	0
					11215588	0	0	0	1	0	0	3	6	0	0	0	2	0	1	2	1	0	0	0	6	7	7	0	0	0	1	2	1	0	0	0	0	0	0	0	0	0	0	0	0	0	0	0	0
					13211176	0	0	0	0	0	0	0	2	0	0	0	1	0	1	1	1	0	0	0	2	4	11	0	0	0	0	3	0	0	0	0	0	0	0	0	0	0	0	0	0	0	0	0	0
					4532910	0	0	0	1	0	0	4	1	0	0	0	0	0	0	2	0	1	3	1	6	3	3	0	0	0	0	1	0	0	0	0	0	0	0	0	0	0	0	0	1	0	0	0	0
					2190730	0	0	0	4	0	0	3	2	0	0	0	0	0	0	0	0	0	0	0	3	5	1	0	0	0	0	0	0	0	0	0	0	0	0	0	0	0	0	0	0	0	0	0	0
		Orphans			218396	0	0	0	0	0	0	0	0	1	4	3	0	2	1	8	10	6	16	22	6	5	13	0	0	1	0	1	0	0	5	0	1	0	1	1	1	1	0	0	0	0	0	1	0
					607253	0	0	0	0	0	0	2	1	0	0	0	1	1	0	0	0	0	6	0	13	15	18	0	0	0	0	1	0	0	0	0	0	0	0	0	0	0	0	0	0	0	0	0	0
					293933750	0	0	0	0	0	0	0	0	0	0	0	1	0	0	1	8	3	4	3	0	2	0	0	0	1	1	0	0	0	0	0	0	0	0	0	0	0	0	0	0	0	0	0	0
					293930118	0	0	0	0	0	0	0	1	1	0	0	6	2	0	11	3	1	5	3	6	7	0	0	0	0	2	0	0	0	0	0	0	0	0	0	0	0	0	0	0	0	0	0	0
					293931142	0	0	0	0	0	0	0	0	0	0	0	0	1	0	1	4	4	6	2	0	0	0	0	0	0	0	0	0	0	0	0	0	0	0	0	0	0	0	0	0	0	0	0	0
					293933009	0	0	2	0	0	0	0	0	0	0	0	1	3	0	0	0	2	3	3	6	2	2	0	0	0	0	0	0	0	0	0	0	0	0	0	0	0	0	0	0	0	1	0	0
		Unknown			5161627	0	0	0	0	0	0	1	0	0	0	0	0	2	0	1	1	1	1	3	0	1	0	0	0	0	0	0	1	0	1	0	0	0	0	0	2	0	0	0	0	0	0	0	1
																																				1	2	3	4	5	6	7	8	9	10	11	12	13	14
[truncated: 149 more columns]
