# Supplementary material for: A resource for the Drosophila antennal lobe provided by the connectome of glomerulus VA1v
Source: eLife journal article supplement (doi:10.7554/elife.37550), 2018-11-01

Orphan\_218396

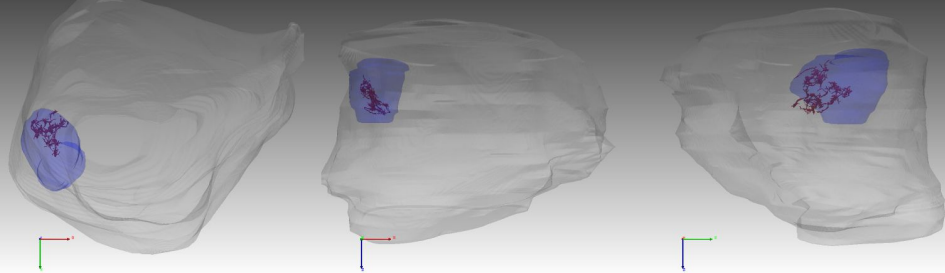

Orphan\_293930118

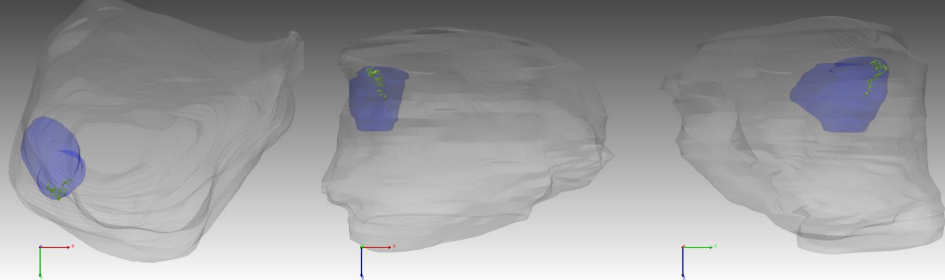

Orphan\_293931142

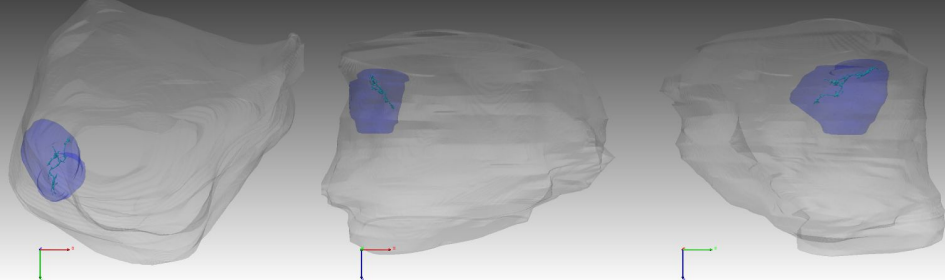

Orphan\_293933009

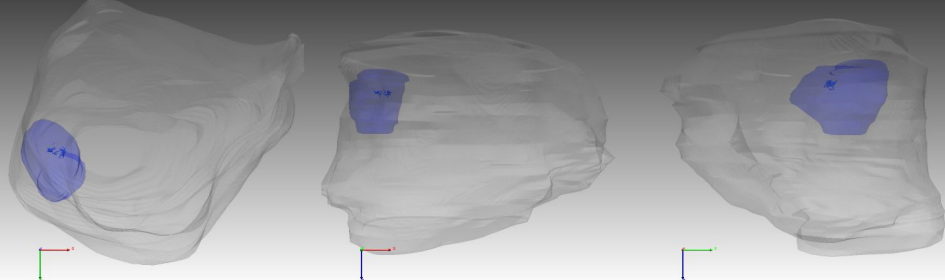

Orphan\_293933750

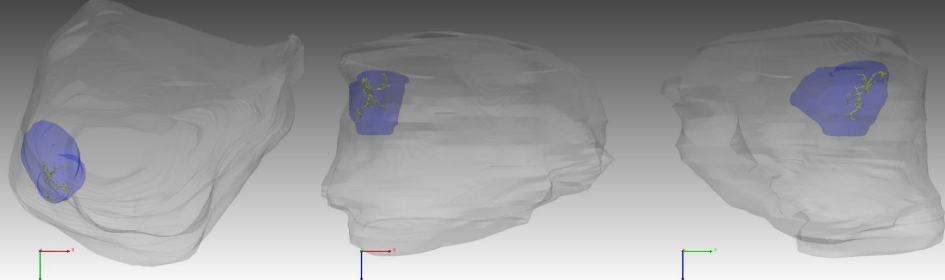

Orphan\_607253

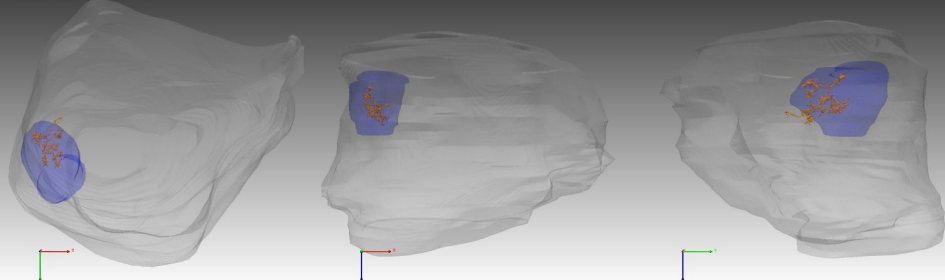

Unknown\_5161627

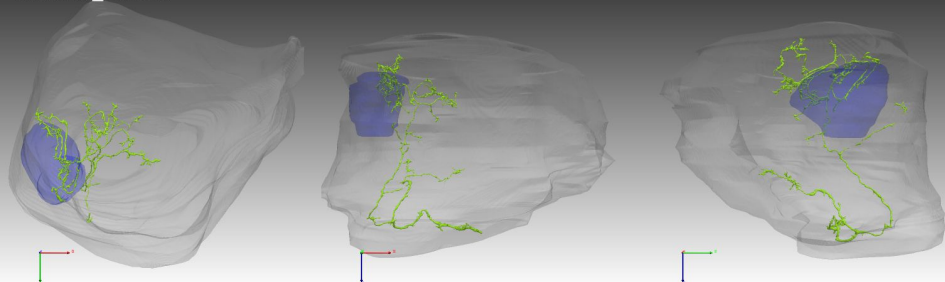

Supplement: supp [file elife-37550-supp-v1.zip]
